# Supplementary material
Source: publisher site journal article supplement (https://static.cambridge.org/content/id/urn:cambridge.org:id:article:S1053837220000474/resource/name/S1053837220000474supp002.pdf)
Supplement: Supplementary file 1 [file S1053837220000474supp002.pdf]

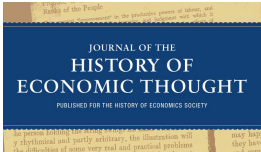

## Online Appendix to JHET Interviews: Anthony Waterman, by Ross Emmett

March 2022 issue

(DOI: <https://doi.org/10.1017/S105383722100050X>)

### Publications by Anthony M. C. Waterman

1965. "The Lord's Day in a Secular Society: a Historical Comment on the Canadian Lord's Day Act of 1906." *Canadian Journal of Theology*, 11(2): 108-123.
1965. "Economic Policy and the Rate of Growth: Canada, 1945-63." *Australian Economic Papers*, 4(1-2): 37-56.
- 1966a. "Some Footnotes to the 'Swan Diagram': or, How Dependent is a Dependent Economy?" *Economic Record*, 42(1-4): 447-464.
- 1966b. "The Timing of Economic Fluctuations in Australia, January 1948 to December 1964." *Australian Economic Papers*, 5(2): 77-102.
- 1971a. "A Simple Keynesian Alternative to Neher's Model." In N. Swan and D. A. Wilton, eds., *Inflation in the Canadian Experience*. Kingston: Queen's University Press.
- 1971b. "Inflation, Unemployment and Demand Management in Canada, 1956 to 1970." Staff Study for Prices and Incomes Commission, Ottawa, July 1971.
1972. *Economic Fluctuations in Australia, 1945-1964*. Canberra: Australian National University Press.
- 1973a. *The Measurement of Economic Fluctuations in Canada, 1947 to 1970*. Ottawa: Prices and Incomes Commission (Staff Study).
- 1973b. "Canadian Universities and the Canadian Identity." *University Affairs*, February.
1974. "Nationalism, Sovereignty and Economic Policy." *Canadian Review of Studies in Nationalism*, 2(1): 1-22.
1976. "How High Should Tuition Fees Be?" *Financial Post*, 12 June 1976.
- 1977a. "Public Opinion and the Unemployment-Inflation 'Trade-Off'." *Wage-Price Law and Economics Review*.
- 1977b. "Towards the Elimination of Poverty and Social Injustice." Report of the National Task Force on the Economy to General Synod, Anglican Church of Canada, Toronto, July 1977.

- 1978a, with B. L. Scarfe. "On Applying Ockham's Razor to the Monetarist Controversy." *Canadian Journal of Economics*, 11(3): 570-583.
- 1978b, with other members of the National Task Force on the Economy. *Poverty in Canada: A Christian Perspective*. Toronto: Anglican Book Centre.
1981. "Unemployment and Inflation in the Canadian Business Cycle, 1947 to 1978." In R. C. Bellan and H. G. Pope, eds., *The Canadian Economy: Problems and Options*. Toronto: McGraw-Hill Ryerson.
- 1982a. "Property Rights in John Locke and in Christian Social Teaching." *Review of Social Economy*, 40(2): 97-115.
- 1982b. "Private Property, Inequality, Theft." In P. Jefferson, ed., *The Voice from the Mountain*. Toronto: Anglican Book Centre.
- 1982c, with D. P. J. Hum and B. L. Scarfe, eds. *The Collected Economic Papers of C. L. Barber*. Winnipeg: Institute for Social and Economic Research.
- 1982d, with D. P. J. Hum and B. L. Scarfe. "Clarence Barber and Canadian Economics." In *The Collected Economic Papers of C. L. Barber*.
- 1983a. "The Ideological Alliance of Political Economy and Christian Theology 1798-1833." *Journal of Ecclesiastical History*, 34(2): 231-244.
- 1983b. "Malthus as a Theologian: the First Essay and the Relation between Political Economy and Christian Theology." In J. Dupâquier, E. Grebenik, and A. Fauve-Chamoux, eds., *Malthus: Past and Present*. London: Academic Press.
- 1983c. "The Catholic Bishops and Canadian Public Policy." *Canadian Public Policy/Analyse de Politiques*, 9(3): 374-382.
- 1983d. "The Scourge of Unemployment." Report of Ad Hoc Committee to General Synod, Anglican Church of Canada, Toronto, May 1983. (Anglican Church of Canada's brief to Macdonald Royal Commission)
- 1984a. "The Catholic Bishops and Canadian Public Policy: A Reply." *Canadian Public Policy/Analyse de Politiques*, 10(3): 338-339.
- 1984b. "Theology and the Redistribution of Wealth." *The Ecumenist*, July-August.
- 1985a. "Malthus Théologien: Economie Politique et Théologie Chrétienne dans le 'Premier Essai'." In A. Fauve-Chamoux, ed., *Dans Malthus Hier et Aujourd'hui*. Paris: Editions du CNRS.
- 1985b. "Religious Belief and Political Bias." In W. Block, H. G. Brennan and K. Elzinga, eds., *The Morality of the Market Place*. Vancouver: Fraser Institute.

1986. "Christian Political Economy: Malthus to Margaret Thatcher." In W. Block and I. Hexham, eds., *Religion, Economics and Social Thought*. Vancouver: Fraser Institute.
- 1987a. "Economists on the Relation between Political Economy and Christian Theology: a Preliminary Survey." *International Journal of Social Economics*, 14(6): 46-68.
- 1987b. "On the Malthusian Theory of Long Swings." *Canadian Journal of Economics*, 20(2): 257-270.
- 1988a. "Hume, Malthus and the Stability of Equilibrium." *History of Political Economy*, 20(1): 85-94.
- 1988b. "Malthus on Long Swings: a Reply." *Canadian Journal of Economics*, 21(1): 206-207.
- 1988c. "Can 'Economic Policy' be 'Christian'?" *Review of Social Economy*, 46(2): 203-211.
- 1988d. "Denys Munby (1919-1976) on Economics and Christianity." *Bulletin of Association of Christian Economists*, No. 12, Fall. Reprinted in *Theology*, March 1990.
- 1991a. *Revolution, Economics and Religion: Christian Political Economy, 1798-1833*. Cambridge: Cambridge University Press. Paperback reprint, 2006.
- 1991b. "A Cambridge 'Via Media' in Late Georgian Anglicanism." *Journal of Ecclesiastical History*, 42(3): 419-436.
- 1991c. "'The Canonical Classical Model of Political Economy' in 1808, as Viewed from 1825: Thomas Chalmers on the 'National Resources'." *History of Political Economy*, 23(2): 221-241.
- 1991d. "The Intellectual Context of *Rerum Novarum*." *Review of Social Economy*, 49(4): 465-482.
- 1991e. "Political Economy and Ideology in the 1820's." *Studies in History and Politics*.
- 1991f. "'Social Justice', Economics and the Problem of Evil." *St Mark's Review*, Autumn.
- 1992a. "Analysis and Ideology in Malthus's Essay on Population." *Australian Economic Papers*, 31(58): 203-17.
- 1992b. *The Humanities in the University: Submission to the Manitoba Education Review Commission*. Winnipeg: Manitoba University Education Review Commission.
- 1993a. "National Security in Classical Political Economy: A Neglected Contribution." *History of Political Economy*, 25(4): 739-744.
- 1993b. "Malthusian Theory." In N. M. de S. Cameron, ed., *Dictionary of Scottish Church History and Theology*. Edinburgh: Rutherford House.
- 1993c. "An Anglican View of *Centesimus Annus*." *St Mark's Review*, Winter.
- 1993d. "Literary Culture at Risk in Society and University." *University of Manitoba Bulletin*, 11 February.

- 1994a, with H. G. Brennan, eds. *Economics and Religion: Are They Distinct?* Dordrecht, London and Boston: Kluwer Academic Publishers.
- 1994b, with H. G. Brennan. "Introduction: Economics and Religion?" In *Economics and Religion: Are They Distinct?*.
- 1994c. "Whately, Senior and the Methodology of Classical Political Economy". In *Economics and Religion: Are They Distinct?*.
- 1994d, with H. G. Brennan. "Summary if Not Conclusions." In *Economics and Religion: Are They Distinct?*.
- 1994e. "The Grand Scheme of Subordination: the Intellectual Roots of Tory Doctrine". In N. Rupke and D. W. Lovell, eds., *Ideas and Ideologies: Essays in Memory of Eugene Kamenka*. St Lucia: University of Queensland Press.
- 1994f. "Liberation Movements and the Market Economy", *Intercollegiate Review*.
1995. "Peasants, Population and Progress in Malthus and Chalmers". In E. Forget and R. A. Lobdell, eds., *The Peasant in Economic Thought*. Aldershot: Edward Elgar.
- 1996a. "The Nexus between Theology and Political Doctrine in Church and Dissent". In K. Haakonssen, ed., *Enlightenment and Religion: the Case of Rational Dissent*. Cambridge: Cambridge University Press.
- 1996b. "In what Sense, if any, is 'Economics' Distinct from 'Religion'; and Why Does it Matter?" *Forum for Social Economics*, 25(2): 9-14.
- 1996c. "Why William Paley was 'the First of the Cambridge Economists'." *Cambridge Journal of Economics*, 20(6): 673-686.
1997. "Recycling Old Ideas: Economics among the Humanities". *Research in the History of Economic Thought and Methodology*, vol. 15.
- 1998a. "David Hume on Technology and Culture." *History of Economics Review*, 28(1): 46-61.
- 1998b. "Reappraisal of 'Malthus the Economist', 1933-97." *History of Political Economy*, 30(2): 293-334.
- 1998c. "Malthus, Mathematics and the Mythology of Coherence." *History of Political Economy*, 30(4): 571-599.
- 1998d, with J. M. Dean, eds. *Religion and Economics: Normative Social Theory*. Dordrecht, London and Boston: Kluwer Academic Publishers.
- 1998e. "Social Thinking in Established Protestant Churches." In *Economics and Religion: Normative Social Theory*.

- 1999a. "'Economics' and 'Ethics' Once Again". *Research in the History of Economic Thought and Methodology*, vol. 17.
- 1999b. "Hollander on the 'Canonical Classical Growth Model': A Comment." *Journal of the History of Economic Thought*, 21(3): 311-313.
- 1999c. "Market Social Order and Christian Organicism in *Centesimus Annus*." *Journal of Markets and Morality*, 2(2): 220-233.
2000. "'Mind Your Own Business?': Unintended Consequences in the Body of Christ", *Faith and Economics*, No. 35, Spring.
- 2001a. "Notes Towards an Un-Canonical, Pre-Classical Model of Political OEconomy." In E. Forget and S. Peart, eds., *Reflecting on the Canon in Economics: Essays in Honor of Samuel Hollander*. London: Routledge.
- 2001b. "The Beginning of 'Boundaries': the Sudden Separation of Political Economy from Christian Theology." In Guido Erreygers, ed., *Economics and Interdisciplinary Exchange*. London: Routledge, 2001. Reprinted in *Economics and Religion* (ed. P. Oslington). Cheltenham: Elgar, 2003.
- 2002a. "'New Political Economies' Then and Now: Economic Theory and the Mutation of Political Doctrine". In Laurence S. Moss, ed., *The New Political Economies: A Collection of Essays from Around the World*. Oxford: Blackwell.
- 2002b. "Economics as Theology: Adam Smith's *Wealth of Nations*." *Southern Economic Journal*, 68(4): 907-921. Reprinted in *Economics and Religion* (ed. P. Oslington). Cheltenham: Elgar, 2003. Polish translation, *Kronos*, 4(39): 61-79, 2016.
- 2002c. "'The Bitter Argument between Economists and Human Beings': the Reception of Malthus's *Essay on Population*." *Research in the History of Economic Thought and Methodology*, vol. 20 (Part 1): 261-270.
- 2002d. "'New Political Economies' Then and Now: Economic Theory and the Mutation of Political Doctrine." *The American Journal of Economics and Sociology*, 61(1): 13-51.
- 2002e. "'Christian Political Economy' and 'Philosophic Radicalism'." *Annals of the Society for the History of Economic Thought* (Japan), 41(41): 1-14.
- 2002f. "The 'Sussex School' and the History of Economic Thought: British Intellectual History, 1750-1950." *European Journal of the History of Economic Thought*, 9(3): 452-463.
- 2002g. "William Godwin". In *Encyclopedia of the Enlightenment*. New York: Oxford University Press.

- 2003a. "Mathematical Modeling as an Exegetical Tool: Rational Reconstruction." In W. J. Samuels, J. E. Biddle, J. B. Davis, eds., *A Companion to the History of Economic Thought*. Oxford: Blackwell, pp. 553-570.
- 2003b. "Economics, Love and Family Values: Nancy Folbre and Jennifer Roback Morse on the Invisible Heart." *The Independent Review*, 7(3): 443-453.
- 2003c. "Romantic Political Economy: Donald Winch and David Levy on Victorian Literature and Economics." *Journal of the History of Economic Thought*, 25(1): 91-102.
- 2003d. "Joan Robinson as a Teacher." *Review of Political Economy*, 15(4): 589-596.
- 2003e. "Should We Listen to the Churches When They Speak on Economic Issues?," *Agenda*, Vol. 10, No. 3, July-August.
- 2004a. *Political Economy and Christian Theology since the Enlightenment: Essays in Intellectual History*. Basingstoke and New York: Palgrave Macmillan.
- 2004b. "Hey, John." In *Oxford Dictionary of National Biography*. Oxford: Oxford University Press.
- 2004c. Two entries to J Gordon Melton, ed., *Encyclopedia of Protestantism*. New York: Blackwell.  
 "Cambridge University"  
 "William Paley"
- 2004d. Two entries to Donald Rutherford, Roger Backhouse, Anthony Brewer, Forrest Capie, Leslie Clarkson, Walter Eltis, Geoffrey Gilbert, Peter Groenewegen, G.C. Harcourt, Stephen Littlechild, T.H. Lloyd, Harro Maas, Noel Thompson, and A.M.C. Waterman, eds., *Biographical Dictionary of British Economists*. Bristol: Thoemmes Press.  
 "Edward Copleston"  
 "William Paley"
- 2005a. "Mill versus Liberty: A Review of Linda C. Raeder's 'John Stuart Mill and the Religion of Humanity'." *The American Journal of Economics and Sociology*, 64(2): 723-734.
- 2005b. "The Oldest Extant Undergraduate Essay in Economics?" *Journal of the History of Economic Thought*, 27(4): 359-373.
- 2006a. "New Light on Malthus: the Kanto Gakuen Collection." *Research in the History of Economic Thought and Methodology*, 24 (Part 1):141-151.
- 2006b. "The Place of Thomas Chalmers in Scottish Political Economy". In A. and S. Dow, eds., *The History of Scottish Economic Thought*. London: Routledge.
- 2006c. "Economia Politica Cristiana". In V. Melchiorre et al., eds., *Enciclopedia Filosofica*. Padova: CSFG.

- 2007a. "Malthus, Thomas Robert". In *International Encyclopedia of the Social Sciences*, 2nd ed. Farmington Hills MI: Macmillan Reference USA.
- 2007b. "Malthus." In *New Dictionary of Scientific Biography*, revised ed. Farmington Hills: Scribner.
- 2007c. "The Market Economy." *Christian Week*, 20:22, 1 February.
- 2008a. "Is 'Political Economy' Really a Christian Heresy?" *Faith and Economics*, 51(Spring): 31-55.
- 2008b. "The Changing Theological Context of Economic Analysis since the Eighteenth Century", *History of Political Economy*, 40(Annual Supplement): 121-142.
- 2008c. "Two Kinds of 'History of Economics'." *History of Economic Ideas*, 16(3): 106-111.
- 2008d, with H. G. Brennan. "Christian Theology and Economics: Convergences and Clashes." In R. Harper and Samuel Gregg, eds., *Christian Theology and Market Economics*. Cheltenham UK: Edward Elgar.
- 2008e. "Political Economy: the English School." *The New Palgrave Dictionary of Economics*, 2nd Edition. London: Palgrave Macmillan.
- 2008f, with Geoffrey Brennan, eds. "Are Economists Basically Immoral?" *And Other Essays on Economics, Ethics, and Religion by Paul Heyne*. Indianapolis: Liberty Fund.
- 2008g. "Fundamentalism in Religion, Politics and Science." *C2C*, 2 April.
- 2009a. "Adam Smith's Macrodynamic Conception of the Natural Wage." *History of Economics Review*, 49(1): 45-60.
- 2009b. "Frank Knight, Ross Emmett and the University of Chicago." Foreword. In Ross B. Emmett, *Frank Knight and the Chicago School in American Economics*. London: Routledge.
- 2009c. "Sorting Through Keynesian Rubble." *C2C*, 23 June.
- 2010, with Steven Medema. "Paul Anthony Samuelson: Historian of Economic Thought." *History of Economic Ideas*, 18(3): 67-86.
- 2011a. "The True Wealth of Nations in Recent Catholic Social Thought: A Review Essay." *Faith and Economics*, 57(Spring): 47-55.
- 2011b. "William Paley." In *The New Palgrave Dictionary of Economics Online*, London: Palgrave Macmillan.
- 2011c. "Preface" to P. Oslington, ed., *Adam Smith as Theologian*. London: Routledge.
- 2011d. "Be the Vicar o' Bull'umpton Gay?" *Trollopiana*, 89(Spring).
2012. "Adam Smith and Malthus on High Wages." *European Journal of the History of Economic Thought*, 19(3): 409-429.

- 2013a. “‘The Merchants of Cadiz and Lisbon’: Parsimony, the Rate of Profit and Accumulation in *Wealth of Nations*.” *Journal of the History of Economic Thought*, 35(1): 63-76.
- 2013b. “The Relation Between Economics and Theology in *Caritas in Veritate*.” *Erasmus Journal of Philosophy and Economics*, 6(2): 24-42.
- 2014a, with Steven Medema, eds. *Paul Samuelson: Selected Essays in the History of Economic Analysis*. Cambridge: Cambridge University Press.
- 2014b. “Inequality and Social Evil: Wilkinson and Pickett on *The Spirit Level*.” *Faith and Economics*, 63 (Spring): 38-49.
- 2014c. “Can ‘Religion’ Enrich ‘Economics’?” *Econ Journal Watch*, 11(2): 233-242.
- 2014d. “Review of *Caritas in Veritate* and ‘The Crisis in Global Capitalism’.” *Journal of Catholic Social Thought*, 11(2): 501-514.
- 2014e. “Theology and the Rise of Political Economy in Britain in the Eighteenth and Nineteenth Centuries.” In P. Oslington, ed., *The Oxford Handbook of Christianity and Economics*. Oxford: Oxford University Press.
- 2014f. “Is there Another, Quite Different, ‘Adam Smith Problem’?” *Journal of the History of Economic Thought*, 36(4): 401-420.
2015. “*Moral Philosophy or Economic Analysis?* The Oxford Handbook of Adam Smith.” *Review of Political Economy*, 27(2): 218-229.
2016. “*Rerum Novarum* and Economic Thought.” *Faith and Economics*, 67(Spring): 29-56.
- 2017a. “Pope Francis on the Environmental Crisis.” *The Independent Review*, 21(3): 375-398.
- 2017b. “On the Relation between Economics and Religion.” *Economic Alternatives*, 2(June): 197-212.
- 2017c. “William Paley 1743-1805”. In Robert Cord, ed., *The Palgrave Companion to Cambridge Economics*. London: Palgrave Macmillan.
- 2019a. “The Evolution of ‘Orthodoxy’ in Economics from Adam Smith to Paul Samuelson.” *The Independent Review*, 24(3): 325-345.
- 2019b. “Review of Rudi Verburg’s *Greed, Self-Interest and the Shaping of Economics*.” *The Erasmus Journal of Philosophy and Economics*, 12(2): 86-96.
- 2020, with Geoffrey Brennan. “Economics Meets *War and Peace*: Tolstoy’s Implicit Social Theory.” *The Independent Review*, 25(3): 397-410.
- 2021a, with Geoffrey Brennan. “Faith and Economics in Robinson Crusoe.” *Faith and Economics*, 76(Fall).



2021b. “On Economics, Theology and Religion.” *Journal of Economics, Theology and Religion*, 1(1): 13-24.

2022. “‘Economic Doctrine’ in the Church of England since the Reformation”. In Robert Sauer, ed., *The Economics of Religion*. World Scientific Publishing, forthcoming.
